# Supplementary material for: Chronic Arsenic Exposure Upregulates the Expression of Basal Transcriptional Factors and Increases Invasiveness of the Non-Muscle Invasive Papillary Bladder Cancer Line RT4
Source: MDPI journal article supplement (doi:10.3390/ijms232012313), 2022-10-14
Supplement: s1 [file s1]

# Supplementary Figure S1. Gene Expression in RT4 cells.

**A**

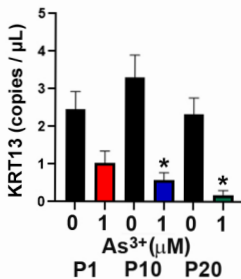

**C**

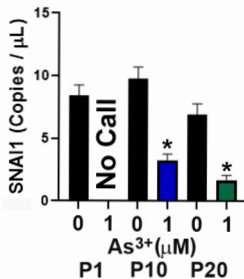

**E**

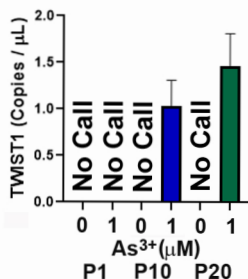

**B**

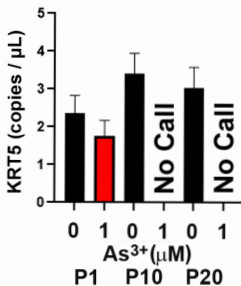

**D**

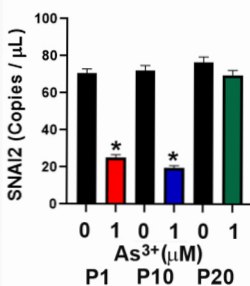

Supplementary Figure S2. Uncropped Western blots for Figures 2-4

### Uncropped Western blots for Figure 2

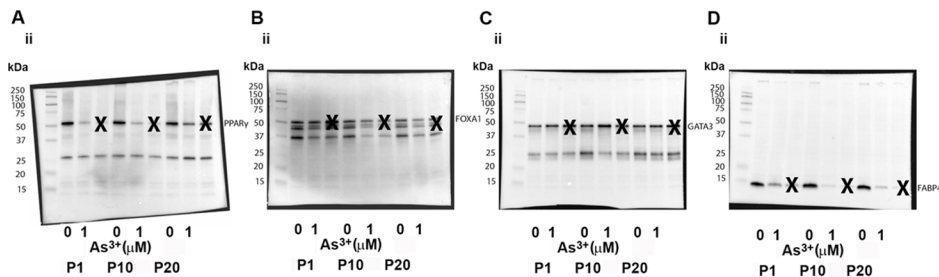

### Uncropped Western blots for Figure 3

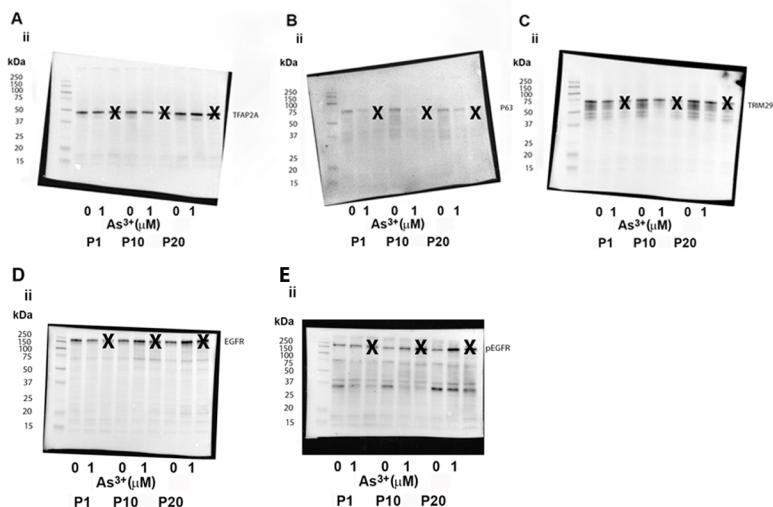

### Uncropped Western blots for Figure 4

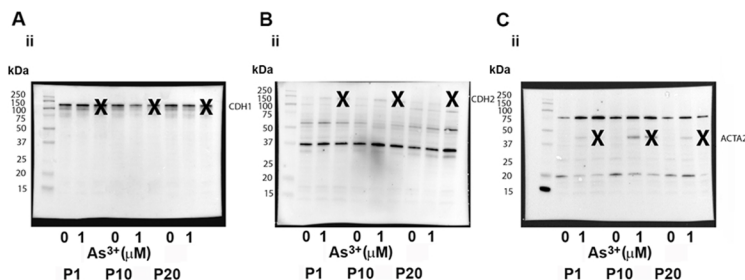

Supplementary Figure S3. Immunohistochemical analysis.

**KRT13**

**KRT5**

**Parent**

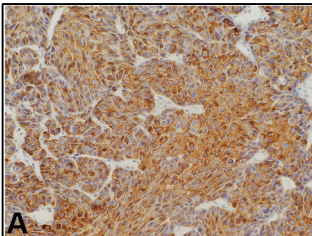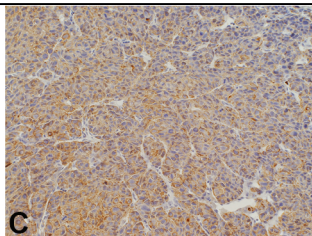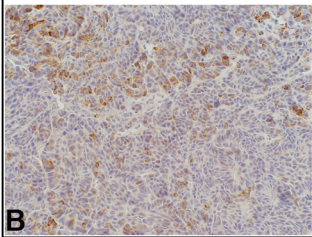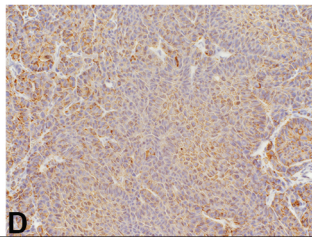

**1μM As<sup>3+</sup>**

Supplementary Figure S4. Total protein loading for Western blot.

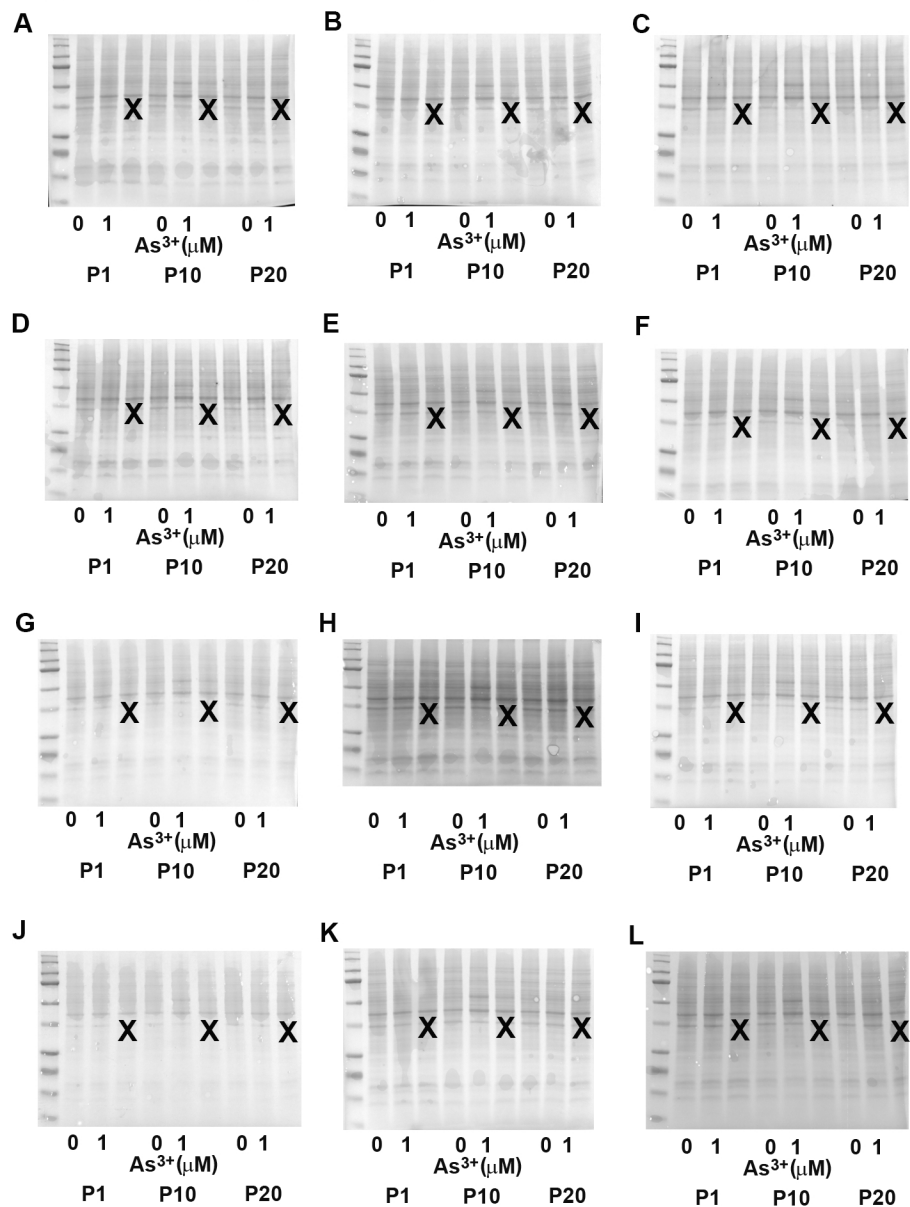

## Legends for Supplementary Data

**Figure S1. Gene expression in parent and As<sup>3+</sup>-exposed RT4 cells.** (A) KRT13 expression, (B) KRT5 expression, (C) SNAI1 expression, (D) SNAI2 expression, and (E) TWIST1 expression in parent and 1μM As<sup>3+</sup>-exposed RT4 cells at passages 1, 10, and 20 (P1, P10, and P20). Droplet digital PCR (ddPCR) analysis was performed to verify gene expression. Gene expression is reported as copies per μL. Triplicate measurements of gene data was performed and are reported as mean ± SEM. Ordinary one-way ANOVA was performed followed by Dunnett's post-hoc test. A “no call” label indicates that expression was below limit of quantification of the instrument. Asterisks indicate significant differences from the passaged-matched parent (p < 0.05).

**Figure S2. Uncropped Western blots for Figures 2-4.** The total intensity for each protein band was quantified using Image Lab software (version 4.1, Bio-Rad Laboratories) and was normalized based on total protein loaded per lane. The lanes crossed out with an “X” were extra samples that were not used in the final analysis for this manuscript.

**Figure S3. Immunohistochemical staining of keratins within the tumors formed from parent and As<sup>3+</sup>-exposed RT4 cells.** (A-C). Cytoplasmic expression of keratin 13 (KRT13) in tumors produced by the parent and As<sup>3+</sup>-treated cells, the staining was strong in the parent and weaker in the tumors arising from As<sup>3+</sup>-treated cells. (D-F). Cytoplasmic staining of keratin 5 (KRT5), the tumors arising from the 1μM As<sup>3+</sup>-treated cells appeared to have weaker staining compared to the tumors from parent cells. The brown color indicates the presence of the protein whereas the

blue/purple color indicates the nuclei that are stained with the counterstain hematoxylin. All images are at a magnification of 200X.

**Figure S4. Total protein loading for Western blot analysis in parent and As<sup>3+</sup>-exposed RT4 cells at passages 1, 10, and 20 (P1, P10, and P20).** Total protein per lane for (A) PPAR $\gamma$  blot, (B) FOXA1 blot, (C) GATA3 blot, (D) FABP4 blot, (E) TFAP2A blot, (F) P63 blot, (G) TRIM29 blot, (H) phospho-EGFR blot, (I) EGFR blot, (J) CDH1 blot, (K) CDH2 blot, and (L) ACTA2 blot. The total intensities per lane (sum of all protein bands) were quantified using Image Lab software (version 4.1, Bio-Rad Laboratories) and used for normalization of target protein expression. The lanes crossed out with an “X” were extra samples that were not used in the final analysis for this manuscript.

Table S1

List of primers used in the study

| Genes  | Catalog No./unique Assay ID | Source  |
|--------|-----------------------------|---------|
| KRT5   | qHsaCID0047798              | BIO-RAD |
| KRT6A  | qHsaCID0036985              | BIO-RAD |
| KRT6B  | qHsaCID0003069              | BIO-RAD |
| KRT6C  | qHsaCID0046712              | BIO-RAD |
| KRT14  | qHsaCID0047868              | BIO-RAD |
| ACTA2  | qHsaCID0013300              | BIO-RAD |
| CDH1   | qHsaCID0015365              | BIO-RAD |
| CDH2   | qHsaCID0015189              | BIO-RAD |
| EGFR   | qHsaCID0007564              | BIO-RAD |
| FOXA1  | qHsaCID0002547              | BIO-RAD |
| GATA3  | qHsaCID0017793              | BIO-RAD |
| KRT13  | qHsaCID0022608              | BIO-RAD |
| FABP4  | qHsaCID0036778              | BIO-RAD |
| PPARG  | qHsaCID0011718              | BIO-RAD |
| TP63   | qHsaCID0036332              | BIO-RAD |
| TFAP2A | qHsaCED0044753              | BIO-RAD |
| TRIM29 | qHsaCED0005341              | BIO-RAD |

Table S2. Antibodies used in Western blot and immunohistochemistry analysis.

| Antigen            | Source                    | Cat. No   | Western blot Dilution | Immunohistochemical Dilution |
|--------------------|---------------------------|-----------|-----------------------|------------------------------|
| Keratin 5 (KRT5)   | Invitrogen                | PA5-29670 | 1:4,000               | 1:400                        |
| Keratin 6 (KRT6)   | Santa Cruz Biotechnology  | sc-514520 | 1:2000                | 1:400                        |
| Keratin 13 (KRT13) | Abcam                     | ab92551   | 1:100,000             | 1:200                        |
| Keratin 14 (KRT14) | Abcam                     | ab181595  | 1:20,000              | --                           |
| EGFR               | Cell Signaling Technology | 4267      | 1:1000                | 1:50                         |
| pEGFR              | Cell Signaling Technology | 3777      | 1:1000                | 1:100                        |
| TFAP2A             | Cell Signaling Technology | 3215      | 1:1000                | 1:50                         |
| TRIM29             | Abcam                     | ab244380  | 1:750                 | 1:400                        |
| P63                | BioLegend                 | 687202    | 1:500                 | --                           |
| PPARG              | Santa Cruz Biotechnology  | sc-7273   | 1:250                 | --                           |
| FOXA1              | Santa Cruz Biotechnology  | sc-101058 | 1:250                 | 1:50                         |
| GATA3              | Cell Signaling Technology | 5852      | 1:1000                | 1:250                        |
| FABP4              | Santa Cruz Biotechnology  | sc-271529 | 1:1000                | 1:50                         |
| E-Cadherin (CDH1)  | Santa Cruz Biotechnology  | sc-7870   | 1:1000                | 1:100                        |
| N-Cadherin (CDH2)  | Invitrogen                | PA5-19486 | 1:1000                | 1:100                        |
| ACTA2              | Abcam                     | ab5694    | 1:1000                | 1:200                        |
| P63                | Abcam                     | ab124762  | --                    | 1:1500                       |
| PPARG              | Cell Signaling Technology | 2435      | --                    | 1:400                        |
| Keratin 14 (KRT14) | Invitrogen                | PA5-16722 | --                    | 1:400                        |
